# Supplementary material for: The Potential of the Diarsene Complex [(C5H5)2Mo2(CO)4(μ,η2‐As2)] as a Connector Between Silver Ions
Source: PubMed Central journal article supplement — Chemistry. 2020 Oct 7;26(63):14315–9. doi: 10.1002/chem.202002513 (PMC7702026; doi:10.1002/chem.202002513), 2020-10-07
Supplement: CHEM-26-14315-s001.pdf [file CHEM-26-14315-s001.pdf]

# Chemistry–A European Journal

Supporting Information

## The Potential of the Diarsene Complex $[(C_5H_5)_2Mo_2(CO)_4(\mu,\eta^2-As_2)]$ as a Connector Between Silver Ions

Mehdi Elsayed Moussa<sup>+</sup>, Jana Schiller<sup>+</sup>, Eugenia Peresykina, Michael Seidl, Gábor Balázs, Pavel Shelyganov, and Manfred Scheer<sup>\*[a]</sup>



## General

All manipulations were carried out under an inert atmosphere of dry nitrogen using standard glove-box and Schlenk techniques. The ligand complex  $[\text{Cp}_2\text{Mo}_2(\text{CO})_4(\mu, \eta^2\text{-As}_2)]$  (**B**)<sup>[1]</sup> and the Ag(I) salts  $\text{Ag}[\text{FAI}\{\text{OC}(\text{C}_6\text{F}_5)(\text{C}_6\text{F}_{10})\}_3]$ <sup>[2]</sup> and  $\text{Ag}[\text{Al}\{\text{OC}(\text{CF}_3)_3\}_4]$ <sup>[3]</sup> were prepared according to literature procedures. Solvents were freshly distilled under argon from  $\text{CaH}_2$  ( $\text{CH}_2\text{Cl}_2$ ) and from Na/K alloy (n-pentane). IR spectra were recorded as solids using a ThermoFisher Nicolet iS5 FT-IR spectrometer with an ATR-Ge disc.  $^1\text{H}$  and  $^{13}\text{C}$  spectra were recorded on a Bruker Avance 400 spectrometer.  $^1\text{H}$  and  $^{13}\text{C}$  chemical shifts were reported in parts per million (ppm) relative to  $\text{Me}_4\text{Si}$  as external standard.  $^{13}\text{C}$  NMR chemical shifts were decoupled from the protons. For the ESI-MS a Finnigan Thermoquest TSQ 7000 mass spectrometer was used. Elemental analyses were performed on an Elementar Vario EL III apparatus by the microanalytical laboratory of the University of Regensburg.

### Synthesis of $[\{\{\text{CpMo}(\text{CO})_2\}_2\{\eta^2\text{-}\eta^2\text{-As}_2\}\}_4\text{Ag}_2][\text{FAI}\{\text{OC}(\text{C}_6\text{F}_5)(\text{C}_6\text{F}_{10})\}_3]_2$ (**4**):

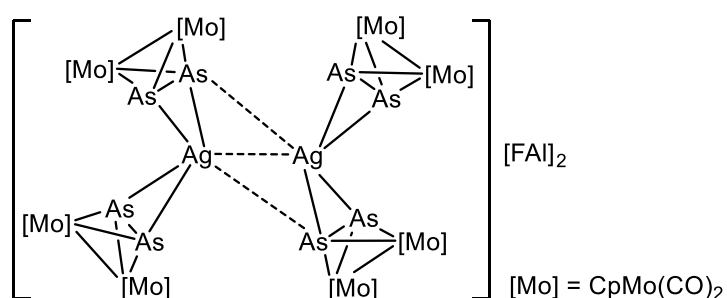

A solution of  $\text{Ag}[\text{FAI}]$  (76 mg, 0.05 mmol, 1 eq.) in 5 mL of  $\text{CH}_2\text{Cl}_2$  and slowly added to a stirred solution of  $[\text{CpMo}_2(\text{CO})_4(\eta^2\text{-As}_2)]$  (**B**) (58 mg, 0.1 mmol, 2 eq.) in 10 ml of  $\text{CH}_2\text{Cl}_2$ . The red solution was stirred for 1 h at room temperature, after which, it was carefully layered with 30 ml of n-pentane. In two days, red crystals of **4** were obtained, collected, washed with n-pentane (5 ml  $\times$  2) and dried in vacuum. Yield (48 mg, 36%).

$^1\text{H}$  NMR (400 MHz,  $\text{CD}_3\text{CN}$ ):  $\delta$  = 5.34 ppm (s,  $\text{H}_{\text{Cp}}$ ).  $^{13}\text{C}\{^1\text{H}\}$  NMR (100 MHz,  $\text{CD}_3\text{CN}$ ):  $\delta$  = 86.7 (s,  $\text{C}_{\text{Cp}}$ ), 224.5 ppm (s,  $\text{C}_{\text{CO}}$ ). Positive ion ESI-MS ( $\text{CH}_3\text{CN}$ , RT):  $m/z$  (%) = 1276.3 (100)  $[\{\{\text{Cp}_2(\text{CO})_4\text{Mo}_2\text{As}_2\}_2\text{Ag}\}^+$ , 731.6 (80)  $[\{\{\text{Cp}_2(\text{CO})_4\text{Mo}_2\text{As}_2\}\text{Ag}(\text{CH}_3\text{CN})\}^+$ , 690.6 (30)  $[\{\{\text{Cp}_2(\text{CO})_4\text{Mo}_2\text{As}_2\}\text{Ag}\}^+$ , 583.7 (7)  $[\text{Cp}_2(\text{CO})_4\text{Mo}_2\text{As}_2]^+$ . Negative ion ESI-MS ( $\text{CH}_3\text{CN}$ , RT):  $m/z$  (%) = 1380.9  $[\text{FAI}\{\text{OC}_6\text{F}_{10}(\text{C}_6\text{F}_5)\}_3]^-$ . Elemental analysis, calcd (%) for  $\text{C}_{128}\text{H}_{40}\text{Ag}_2\text{Al}_2\text{As}_8\text{F}_{92}\text{Mo}_8\text{O}_{22}$  (5314.16): C, 28.93; H, 0.76; found: C, 28.69; H, 0.79; IR (solid, CO bands):  $\tilde{\nu}/\text{cm}^{-1}$ : 1971 (vs), 1933 (vs), 1921 (vs).

### Synthesis of $[\{\{\text{CpMo}(\text{CO})_2\}_2\{\eta^2\text{-}\eta^2\text{-As}_2\}\}_2\{\{\text{CpMo}(\text{CO})_2\}_2\{\eta^1\text{-}\eta^2\text{-}\eta^2\text{-As}_2\}\}_3\text{Ag}_3][\text{Al}\{\text{OC}(\text{CF}_3)_3\}_4]_3$ (**5**):

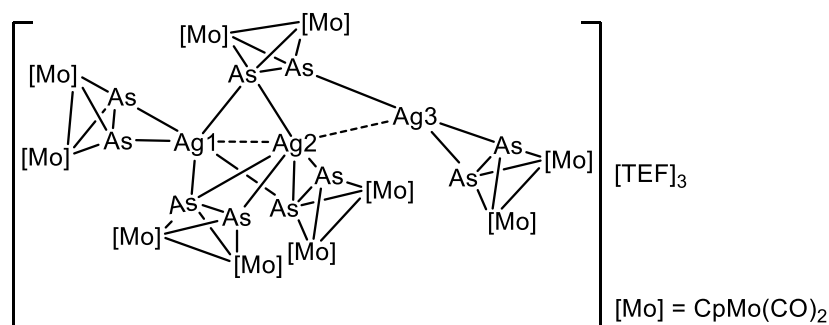

A solution of Ag[TEF] (54 mg, 0.05 mmol, 1 eq.) in 5 mL of CH<sub>2</sub>Cl<sub>2</sub> and slowly added to a stirred solution of [CpMo<sub>2</sub>(CO)<sub>4</sub>(η<sup>2</sup>-As<sub>2</sub>)] (**B**) (58 mg, 0.1 mmol, 2 eq.) in 10 ml of CH<sub>2</sub>Cl<sub>2</sub>. The red solution was stirred for 1 h at room temperature, after which, it was carefully layered with 30 ml of n-pentane. In one week, red crystals of **5** were obtained, collected, washed with n-pentane (5 ml × 2) and dried in vacuum. Yield (61 mg, 60%).

<sup>1</sup>H NMR (400 MHz, CD<sub>3</sub>CN): δ = 5.34 ppm (s, H<sub>Cp</sub>). <sup>13</sup>C{<sup>1</sup>H} NMR (100 MHz, CD<sub>3</sub>CN): δ = 86.7 (s, C<sub>Cp</sub>), 224.5 ppm (s, C<sub>CO</sub>). Positive ion ESI-MS (CH<sub>3</sub>CN, RT): *m/z* (%) = 1276.3 (42) [Cp<sub>2</sub>(CO)<sub>4</sub>Mo<sub>2</sub>As<sub>2</sub>Ag]<sup>+</sup>, 731.7 (100) [(Cp<sub>2</sub>(CO)<sub>4</sub>Mo<sub>2</sub>As<sub>2</sub>)Ag(CH<sub>3</sub>CN)]<sup>+</sup>, 690.6 (16) [Cp<sub>2</sub>(CO)<sub>4</sub>Mo<sub>2</sub>As<sub>2</sub>Ag]<sup>+</sup>. Negative ion ESI-MS (CH<sub>3</sub>CN, RT): *m/z* (%) = 966.9 (100) [Al{OC(CF<sub>3</sub>)<sub>3</sub>}<sub>4</sub>]<sup>-</sup>. Elemental analysis, calcd (%) for C<sub>118</sub>H<sub>50</sub>Ag<sub>3</sub>Al<sub>3</sub>As<sub>10</sub>F<sub>108</sub>Mo<sub>10</sub>O<sub>32</sub> (6144.67): C, 23.07; H, 0.82; found: C, 23.11; H, 0.93; IR (solid, CO bands):  $\tilde{\nu}/\text{cm}^{-1}$ : 1980 (vs), 1949 (vs).

### Synthesis of [CpMo(CO)<sub>2</sub>]<sub>2</sub>{η<sup>1</sup>:η<sup>2</sup>:η<sup>2</sup>-As<sub>2</sub>}<sub>4</sub>Ag<sub>3</sub>[Al{OC(CF<sub>3</sub>)<sub>3</sub>}<sub>4</sub>]<sub>3</sub> (**6**):

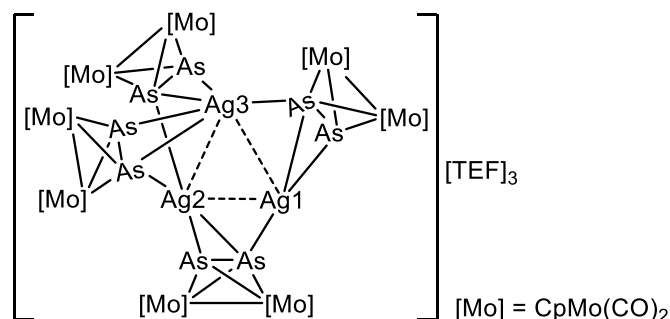

A solution of Ag[TEF] (54 mg, 0.05 mmol, 1 eq.) in 5 mL of CH<sub>2</sub>Cl<sub>2</sub> and slowly added to a stirred solution of [CpMo<sub>2</sub>(CO)<sub>4</sub>(η<sup>2</sup>-As<sub>2</sub>)] (**B**) (29 mg, 0.05 mmol, 1 eq.) in 5 ml of CH<sub>2</sub>Cl<sub>2</sub>. The red solution was stirred for 1 h at room temperature, after which, it was carefully layered with 30 ml of n-pentane. In four days, red crystals of **6** were obtained, collected, washed with n-pentane (5 ml × 2) and dried in vacuum. Yield (65 mg, 71%).

<sup>1</sup>H NMR (400 MHz, CD<sub>3</sub>CN): δ = 5.34 ppm (s, H<sub>Cp</sub>). <sup>13</sup>C{<sup>1</sup>H} NMR (100 MHz, CD<sub>3</sub>CN): δ = 86.7 (s, C<sub>Cp</sub>), 224.5 ppm (s, C<sub>CO</sub>). Positive ion ESI-MS (CH<sub>3</sub>CN, RT): *m/z* (%) = 1276.3 (100) [Cp<sub>2</sub>(CO)<sub>4</sub>Mo<sub>2</sub>As<sub>2</sub>Ag]<sup>+</sup>, 731.7 (79) [(Cp<sub>2</sub>(CO)<sub>4</sub>Mo<sub>2</sub>As<sub>2</sub>)Ag(CH<sub>3</sub>CN)]<sup>+</sup>, 690.6 (37) [Cp<sub>2</sub>(CO)<sub>4</sub>Mo<sub>2</sub>As<sub>2</sub>Ag]<sup>+</sup>, 583.7 (14) [Cp<sub>2</sub>(CO)<sub>4</sub>Mo<sub>2</sub>As<sub>2</sub>]<sup>+</sup>. Negative ion ESI-MS (CH<sub>3</sub>CN, RT): *m/z* (%) = 966.9 (100) [Al{OC(CF<sub>3</sub>)<sub>3</sub>}<sub>4</sub>]<sup>-</sup>. Elemental analysis, calcd (%) for C<sub>104</sub>H<sub>40</sub>Ag<sub>3</sub>Al<sub>3</sub>As<sub>8</sub>F<sub>108</sub>Mo<sub>8</sub>O<sub>28</sub> (5560.72): C, 23.06; H, 0.82; found: C, 22.82; H, 0.68; IR (solid, CO bands):  $\tilde{\nu}/\text{cm}^{-1}$ : 1977 (vs), 1942 (vs).

## Crystallographic details:

Crystals of **4-6** were taken from a Schlenk flask under a stream of argon and immediately covered with mineral oil to prevent a loss of solvent. The quickly chosen single crystals covered by a thin oil layer were taken to the pre-centered goniometer head with CryoMount® and directly attached to the diffractometer into a stream of cold nitrogen.

The diffraction experiments for **4-6** were collected on a Gemini ultra (**4, 5**) or a SuperNova diffractometers (Rigaku Oxford Diffraction) equipped with fine-focus tube (MoK $\alpha$  radiation,  $\lambda = 0.71073 \text{ \AA}$ ) and Atlas<sup>S2</sup> CCD detectors, using  $\omega$  scans of  $0.75^\circ$  or  $0.5^\circ$  frames, respectively. The diffraction experiment for **6** was collected on a SuperNova diffractometer (Rigaku Oxford Diffraction) equipped with micro-focus SuperNova source (CuK $\alpha$  radiation,  $\lambda = 1.54178 \text{ \AA}$ ) and Atlas<sup>S2</sup> CCD detectors, using  $\omega$  scans of  $1^\circ$  frames. The measurements for **4-6** were performed at 123 K. Absorption corrections were applied analytically using *CrysAlisPRO* Software.<sup>[4]</sup> The crystal structures were solved by direct methods with *SHELXT*<sup>[5]</sup> or *Olex*<sup>[6]</sup> programs and refined by full-matrix least-squares method against  $|F|^2$  in anisotropic approximation using multiprocessor versions of SHELXTL.<sup>[5]</sup> Hydrogen atoms were refined in calculated positions using riding on pivot atom model. In case of the disorder, the site occupancies of the disordered components were refined with their  $U_{\text{iso}}$  fixed at average  $U_{\text{eq}}$  for fully occupied atoms in given structure in order to avoid correlations. After refinement, occupancies were fixed at the resulting values and the refinement of the atomic displacement parameters was performed. The light atoms with site occupation factors less than 0.5 were refined isotropically.

The Cp<sub>2</sub>Mo<sub>2</sub>P<sub>2</sub>(CO)<sub>4</sub> dimers in **4, 5** and **6** demonstrate different type of disorder. It can be rotational caused by re-orientations of Cp groups about the direction of  $\pi$ -bond (the tendency can be seen in **5**), or positional, related to different mutual orientation of the CO, Cp ligands coordinated to Mo atoms (**4, 5, 6**). In the case of **6** the introduction of the minor (refined to 0.03) disorder of the three of 5 {Mo<sub>2</sub>P<sub>2</sub>} dimers allowed to describe otherwise meaningless electron density (2.40-3.23 e $\cdot\text{\AA}^{-2}$ ) and improve quality factors from  $R_1 = 0.0384$ ,  $wR_2 = 0.0905$  to  $R_1 = 0.0271$ ,  $wR_2 = 0.0522$  and maximal ED peak of 0.82 e $\cdot\text{\AA}^{-2}$ .

In all structures with the weakly coordinating anion [TEF], it is disordered. The disorder patterns varied according to different orientations or conformations of the [TEF] anion caused by rotation around O-*tert*C (**4, 5, 6**) or C-C(F<sub>3</sub>) bonds of OC<sub>4</sub>F<sub>9</sub> groups (**5, 6**). In all structures the solvent CH<sub>2</sub>Cl<sub>2</sub> molecules are also either disordered or partly occupied. The disorder patterns are illustrated in the Figures S6, S8 and S10.

The supplementary crystallographic data for this publication (Tables S1-S2: CCDC-1985242 (**4**), CCDC-1985244 (**5**), CCDC-1985245 (**6**)) can be obtained free of charge at [www.ccdc.cam.ac.uk/conts/retrieving.html](http://www.ccdc.cam.ac.uk/conts/retrieving.html) (or from the Cambridge Crystallographic Data Centre, 12 Union Road, Cambridge CB2 1EZ, UK; Fax: + 44-1223-336-033; e-mail: [deposit@ccdc.cam.ac.uk](mailto:deposit@ccdc.cam.ac.uk)).

All ORTEP drawings for **4-6** were made in Olex2 software.<sup>[6]</sup>

**Table 1S. Crystallographic details for 4 and 5.**

| Compound                                                                                                       | 4                                                                                                                                                                                                | 5                                                                                                                                                                                                      |
|----------------------------------------------------------------------------------------------------------------|--------------------------------------------------------------------------------------------------------------------------------------------------------------------------------------------------|--------------------------------------------------------------------------------------------------------------------------------------------------------------------------------------------------------|
| CCDC Code                                                                                                      | CCDC-1985242                                                                                                                                                                                     | CCDC-1985244                                                                                                                                                                                           |
| Crystal data                                                                                                   |                                                                                                                                                                                                  |                                                                                                                                                                                                        |
| Structural formula                                                                                             | [Ag <sub>2</sub> (Cp <sub>2</sub> Mo <sub>2</sub> As <sub>2</sub> (CO) <sub>4</sub> ) <sub>4</sub> ](FAIO <sub>3</sub> C <sub>36</sub> H <sub>45</sub> )·1.675(CH <sub>2</sub> Cl <sub>2</sub> ) | [Ag <sub>3</sub> (Cp <sub>2</sub> Mo <sub>2</sub> As <sub>2</sub> (CO) <sub>4</sub> ) <sub>5</sub> ](AIO <sub>4</sub> C <sub>16</sub> F <sub>36</sub> ) <sub>3</sub> ·4CH <sub>2</sub> Cl <sub>2</sub> |
| Chemical formula                                                                                               | C <sub>129.68</sub> H <sub>43.35</sub> Ag <sub>2</sub> Al <sub>2</sub> As <sub>8</sub> Cl <sub>3.35</sub> F <sub>92</sub> Mo <sub>8</sub> O <sub>22</sub>                                        | C <sub>122</sub> H <sub>58</sub> Ag <sub>3</sub> Al <sub>3</sub> As <sub>10</sub> Cl <sub>8</sub> F <sub>108</sub> Mo <sub>10</sub> O <sub>32</sub>                                                    |
| <i>M<sub>r</sub></i>                                                                                           | 5456.43                                                                                                                                                                                          | 6484.43                                                                                                                                                                                                |
| Crystal system, space group                                                                                    | Orthorhombic, <i>Pccn</i>                                                                                                                                                                        | Monoclinic, <i>P2<sub>1</sub>/n</i>                                                                                                                                                                    |
| Temperature (K)                                                                                                | 123                                                                                                                                                                                              | 123                                                                                                                                                                                                    |
| <i>a</i> , <i>b</i> , <i>c</i> (Å)                                                                             | 18.5126 (3), 33.8843 (8), 25.6612 (6)                                                                                                                                                            | 20.20026(19), 30.0466(3), 31.0089(3)                                                                                                                                                                   |
| β (°)                                                                                                          | 90, 90, 90                                                                                                                                                                                       | 103.4982 (10)                                                                                                                                                                                          |
| <i>V</i> (Å <sup>3</sup> )                                                                                     | 16096.9 (6)                                                                                                                                                                                      | 18301.0 (3)                                                                                                                                                                                            |
| <i>Z</i>                                                                                                       | 4                                                                                                                                                                                                | 4                                                                                                                                                                                                      |
| <i>F</i> (000)                                                                                                 | 10409                                                                                                                                                                                            | 12336                                                                                                                                                                                                  |
| <i>D<sub>x</sub></i> (Mg m <sup>-3</sup> )                                                                     | 2.252                                                                                                                                                                                            | 2.353                                                                                                                                                                                                  |
| Radiation type                                                                                                 | Mo <i>K</i> α                                                                                                                                                                                    | Mo <i>K</i> α                                                                                                                                                                                          |
| μ (mm <sup>-1</sup> )                                                                                          | 2.71                                                                                                                                                                                             | 3.07                                                                                                                                                                                                   |
| Crystal shape                                                                                                  | Prism                                                                                                                                                                                            | prism                                                                                                                                                                                                  |
| Colour                                                                                                         | Red                                                                                                                                                                                              | red                                                                                                                                                                                                    |
| Crystal size (mm)                                                                                              | 0.73 × 0.68 × 0.51                                                                                                                                                                               | 0.71 × 0.62 × 0.38                                                                                                                                                                                     |
| Data collection                                                                                                |                                                                                                                                                                                                  |                                                                                                                                                                                                        |
| Diffractometer                                                                                                 | Xcalibur, Atlas <sup>S2</sup> , Gemini ultra                                                                                                                                                     | Xcalibur, Atlas <sup>S2</sup> , Gemini ultra                                                                                                                                                           |
| Absorption correction                                                                                          | Analytical                                                                                                                                                                                       | Analytical                                                                                                                                                                                             |
| <i>T<sub>min</sub></i> , <i>T<sub>max</sub></i>                                                                | 0.273, 0.398                                                                                                                                                                                     | 0.221, 0.431                                                                                                                                                                                           |
| No. of measured, independent and observed [ <i>I</i> > 2σ( <i>I</i> )] reflections                             | 82022, 26113, 12482                                                                                                                                                                              | 169943, 58279, 38192                                                                                                                                                                                   |
| <i>R<sub>int</sub></i>                                                                                         | 0.042                                                                                                                                                                                            | 0.029                                                                                                                                                                                                  |
| (sin θ/λ) <sub>max</sub> (Å <sup>-1</sup> )                                                                    | 0.756                                                                                                                                                                                            | 0.744                                                                                                                                                                                                  |
| Range of <i>h</i> , <i>k</i> , <i>l</i>                                                                        | <i>h</i> = -27→16, <i>k</i> = -50→32, <i>l</i> = -21→38                                                                                                                                          | <i>h</i> = -29→28, <i>k</i> = -40→44, <i>l</i> = -46→43                                                                                                                                                |
| Refinement                                                                                                     |                                                                                                                                                                                                  |                                                                                                                                                                                                        |
| <i>R</i> [ <i>F</i> <sup>2</sup> > 2σ( <i>F</i> <sup>2</sup> )], <i>wR</i> ( <i>F</i> <sup>2</sup> ), <i>S</i> | 0.044, 0.101, 0.90                                                                                                                                                                               | 0.027, 0.054, 0.90                                                                                                                                                                                     |
| No. of reflections                                                                                             | 26110                                                                                                                                                                                            | 58279                                                                                                                                                                                                  |
| No. of parameters                                                                                              | 1359                                                                                                                                                                                             | 2975                                                                                                                                                                                                   |
| No. of restraints                                                                                              | 0                                                                                                                                                                                                | 0                                                                                                                                                                                                      |
| H-atom treatment                                                                                               | H-atom parameters constrained                                                                                                                                                                    | H-atom parameters constrained                                                                                                                                                                          |
| Δ <sub>max</sub> , Δ <sub>min</sub> (e Å <sup>-3</sup> )                                                       | 1.78, -1.47                                                                                                                                                                                      | 1.26, -1.19                                                                                                                                                                                            |

Computer programs: *CrysAlis PRO* 1.171.38.41, 1.171.38.46 (Rigaku OD, 2015), *SHELXT2015/7* (Sheldrick, 2015), *SHELXL2014/7* (Sheldrick, 2014).

**Table 2S. Crystallographic details for 6**

|                                                                            |                                                                                                                                          |
|----------------------------------------------------------------------------|------------------------------------------------------------------------------------------------------------------------------------------|
| Compound                                                                   | <b>6</b>                                                                                                                                 |
| CCDC Code                                                                  | CCDC-1985245                                                                                                                             |
| Crystal data                                                               |                                                                                                                                          |
| Structural formula                                                         | $[\text{Ag}_3(\text{Cp}_2\text{Mo}_2\text{As}_2(\text{CO})_4)_4](\text{AlO}_4\text{C}_{16}\text{F}_{36})_3 \cdot \text{CH}_2\text{Cl}_2$ |
| Chemical formula                                                           | $\text{C}_{105}\text{H}_{42}\text{Ag}_3\text{Al}_3\text{As}_8\text{Cl}_2\text{F}_{108}\text{Mo}_8\text{O}_{28}$                          |
| $M_r$                                                                      | 5645.71                                                                                                                                  |
| Crystal system, space group                                                | Monoclinic, $P2_1/c$                                                                                                                     |
| Temperature (K)                                                            | 123                                                                                                                                      |
| $a, b, c$ (Å)                                                              | 22.6469(5), 23.0028(4), 30.4515(4)                                                                                                       |
| $\beta$ (°)                                                                | 91.9714(16)                                                                                                                              |
| $V$ (Å <sup>3</sup> )                                                      | 15854.1(5)                                                                                                                               |
| $Z$                                                                        | 4                                                                                                                                        |
| $F(000)$                                                                   | 10728                                                                                                                                    |
| $D_x$ (Mg m <sup>-3</sup> )                                                | 2.365                                                                                                                                    |
| Radiation type                                                             | Cu $K\alpha$                                                                                                                             |
| $\mu$ (mm <sup>-1</sup> )                                                  | 12.025                                                                                                                                   |
| Crystal shape                                                              | plate                                                                                                                                    |
| Colour                                                                     | red                                                                                                                                      |
| Crystal size (mm)                                                          | 0.32 × 0.17 × 0.05                                                                                                                       |
| Data collection                                                            |                                                                                                                                          |
| Diffractometer                                                             | Atlas <sup>S2</sup> , SuperNova                                                                                                          |
| Absorption correction                                                      | Analytical                                                                                                                               |
| $T_{\min}, T_{\max}$                                                       | 0.143, 0.650                                                                                                                             |
| No. of measured, independent and observed [ $I > 2\sigma(I)$ ] reflections | 69104, 32402, 26756                                                                                                                      |
| $R_{\text{int}}$                                                           | 0.0353                                                                                                                                   |
| $(\sin \theta/\lambda)_{\text{max}}$ (Å <sup>-1</sup> )                    | 0.746                                                                                                                                    |
| Range of $h, k, l$                                                         | $h = -28 \rightarrow 27, k = -25 \rightarrow 29, l = -38 \rightarrow 29$                                                                 |
| Refinement                                                                 |                                                                                                                                          |
| $R[F^2 > 2\sigma(F^2)], wR(F^2), S$                                        | 0.0634, 0.1804, 1.02                                                                                                                     |
| No. of reflections                                                         | 32402                                                                                                                                    |
| No. of parameters                                                          | 4201                                                                                                                                     |
| No. of restraints                                                          | 7150                                                                                                                                     |
| H-atom treatment                                                           | H-atom parameters constrained                                                                                                            |
| $\Delta_{\text{max}}, \Delta_{\text{min}}$ (e Å <sup>-3</sup> )            | 1.67, -1.18                                                                                                                              |

Computer programs: *CrysAlis PRO* 1.171.38.41 and 1.171.39.45g (Rigaku OD, 2018), *SHELXL2014/7* (Sheldrick, 2014), *Olex2* (Dolomanov *et al.*, 2009).

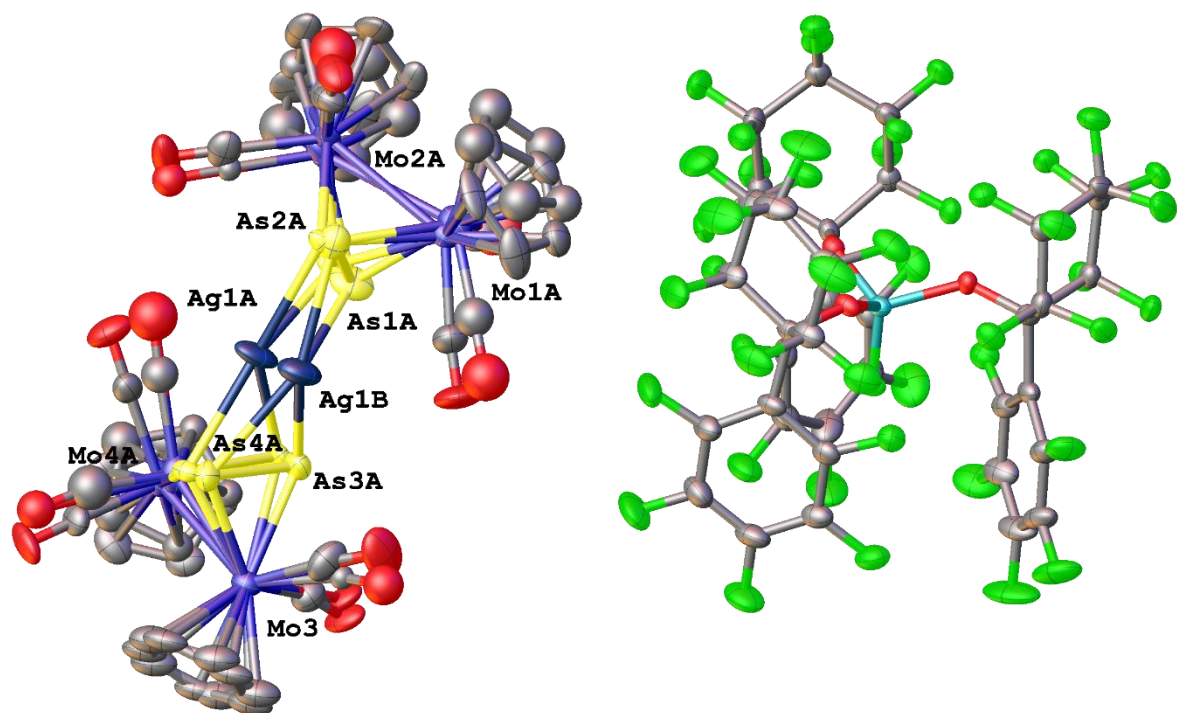

**Figure S1.** Molecular structure of the compound **4** (a.d.p. ellipsoids at 50% probability)

**Table 3S.** Selected geometric parameters (Å, °) for **4**

|                        |             |                              |             |
|------------------------|-------------|------------------------------|-------------|
| Ag1A—As4A              | 2.6188 (15) | Ag1B—Ag1B <sup>i</sup>       | 2.655 (4)   |
| Ag1A—As2A              | 2.678 (3)   | Ag1B—As1B                    | 2.656 (8)   |
| Ag1A—As1A              | 2.705 (2)   | Ag1B—As4B                    | 2.718 (5)   |
| Ag1A—As3A              | 2.706 (2)   | Ag1B—As3B                    | 2.726 (7)   |
| Ag1A—Ag1A <sup>i</sup> | 2.8583 (12) | Ag1B—As4B <sup>i</sup>       | 2.919 (6)   |
| Mo1A—As2A              | 2.553 (5)   | Mo1B—As2B                    | 2.549 (15)  |
| Mo1A—As1A              | 2.629 (4)   | Mo1B—As1B                    | 2.607 (12)  |
| Mo2A—As1A              | 2.545 (2)   | Mo2B—As1B                    | 2.559 (7)   |
| Mo2A—As2A              | 2.623 (3)   | Mo2B—As2B                    | 2.664 (12)  |
| Mo4A—As3A              | 2.5510 (18) | Mo4B—As3B                    | 2.550 (6)   |
| Mo4A—As4A              | 2.6546 (17) | Mo4B—As4B                    | 2.603 (6)   |
| As1A—As2A              | 2.413 (4)   | As1B—As2B                    | 2.331 (14)  |
| As3A—As4A              | 2.414 (2)   | As3B—As4B                    | 2.346 (9)   |
| Ag1B—As2B              | 2.613 (10)  | As4B—Ag1B <sup>i</sup>       | 2.919 (6)   |
|                        |             |                              |             |
| As4A—Ag1A—As2A         | 164.27 (8)  | As1B—Ag1B—As4B               | 127.2 (2)   |
| As4A—Ag1A—As1A         | 142.24 (6)  | As2B—Ag1B—As3B               | 138.7 (3)   |
| As2A—Ag1A—As1A         | 53.27 (9)   | Ag1B <sup>i</sup> —Ag1B—As3B | 116.47 (16) |
| As4A—Ag1A—As3A         | 53.88 (5)   | As1B—Ag1B—As3B               | 86.2 (2)    |
| As2A—Ag1A—As3A         | 138.18 (10) | As4B—Ag1B—As3B               | 51.05 (18)  |



|                              |             |                                           |             |
|------------------------------|-------------|-------------------------------------------|-------------|
| As1A—Ag1A—As3A               | 90.92 (6)   | As2B—Ag1B—As4B <sup>i</sup>               | 91.0 (3)    |
| As4A—Ag1A—Ag1A <sup>i</sup>  | 92.18 (4)   | Ag1B <sup>i</sup> —Ag1B—As4B <sup>i</sup> | 58.15 (12)  |
| As2A—Ag1A—Ag1A <sup>i</sup>  | 72.23 (7)   | As1B—Ag1B—As4B <sup>i</sup>               | 131.75 (18) |
| As1A—Ag1A—Ag1A <sup>i</sup>  | 125.49 (5)  | As4B—Ag1B—As4B <sup>i</sup>               | 99.69 (12)  |
| As3A—Ag1A—Ag1A <sup>i</sup>  | 137.24 (4)  | As3B—Ag1B—As4B <sup>i</sup>               | 122.51 (13) |
| As2A—As1A—Ag1A               | 62.79 (9)   | As2B—As1B—Ag1B                            | 62.8 (3)    |
| Mo2A—As1A—Ag1A               | 116.34 (10) | Mo2B—As1B—Ag1B                            | 120.6 (3)   |
| Mo1A—As1A—Ag1A               | 107.36 (9)  | Mo1B—As1B—Ag1B                            | 105.1 (3)   |
| As1A—As2A—Ag1A               | 63.94 (8)   | As1B—As2B—Ag1B                            | 64.7 (3)    |
| Mo1A—As2A—Ag1A               | 110.47 (14) | Mo1B—As2B—Ag1B                            | 108.0 (5)   |
| Mo2A—As2A—Ag1A               | 114.61 (11) | Ag1B—As2B—Mo2B                            | 118.3 (4)   |
| As4A—As3A—Ag1A               | 61.21 (6)   | As4B—As3B—Ag1B                            | 64.3 (2)    |
| Mo4A—As3A—Ag1A               | 105.44 (7)  | Mo3—As3B—Ag1B                             | 117.1 (2)   |
| Mo3—As3A—Ag1A                | 115.24 (7)  | Mo4B—As3B—Ag1B                            | 109.8 (2)   |
| As3A—As4A—Ag1A               | 64.90 (6)   | As3B—As4B—Ag1B                            | 64.6 (2)    |
| Mo3—As4A—Ag1A                | 120.91 (6)  | Mo3—As4B—Ag1B                             | 120.05 (18) |
| Ag1A—As4A—Mo4A               | 105.00 (6)  | Mo4B—As4B—Ag1B                            | 108.5 (2)   |
| As2B—Ag1B—Ag1B <sup>i</sup>  | 101.2 (3)   | As3B—As4B—Ag1B <sup>i</sup>               | 120.3 (2)   |
| As2B—Ag1B—As1B               | 52.5 (3)    | Mo3—As4B—Ag1B <sup>i</sup>                | 146.48 (15) |
| Ag1B <sup>i</sup> —Ag1B—As1B | 146.34 (14) | Mo4B—As4B—Ag1B <sup>i</sup>               | 143.3 (2)   |
| As2B—Ag1B—As4B               | 153.8 (3)   | Ag1B—As4B—Ag1B <sup>i</sup>               | 56.06 (12)  |
| Ag1B <sup>i</sup> —Ag1B—As4B | 65.79 (14)  |                                           |             |

Symmetry code(s): (i)  $-x+1/2, -y+3/2, z$ .

#### Interpretation of the disorder of the core in the cationic complex **4**

The cationic complex  $[\text{Ag}_3(\text{Cp}_2\text{Mo}_2\text{As}_2(\text{CO})_4)_5]^{3+}$  (**4**) is disordered over two close positions with occupancies 0.75 and 0.25. It occupies special position on the 2-fold axis along  $z$  direction. The half of each two disordered components is located in the asymmetric unit. The symmetrically generated disordered complex is depicted in Figure S2.

If symmetry operation of  $2_z$  axis is applied only to the major (0.75) part of the complex **4**, the resulting core will include only 'green-bonded' atoms in the Figure S2b, if the same procedure is repeated for the minor part (0.25) – the 'red-bonded' atoms. This would be the easiest and straightforward interpretation of the disorder. However, it is also possible, that the red part in the asymmetric part combines with the green part of the symmetrically generated part of the disorder. Then two more combinations 'green-red' and 'red-green' are allowed, which correspond to potentially different cores of the complex **4** (Figure S3).

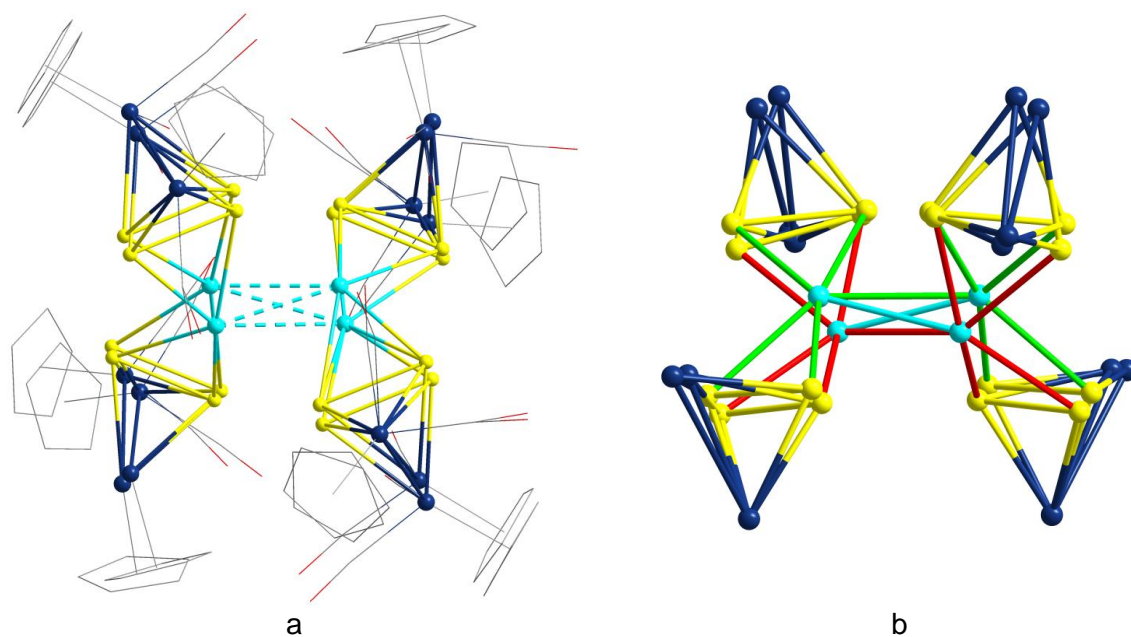

**Figure S2.** (a) Disordered cationic part in **4** and (b) the view of the disordered core with highlighted major (0.75, green bonds) and minor (0.25, red bonds).

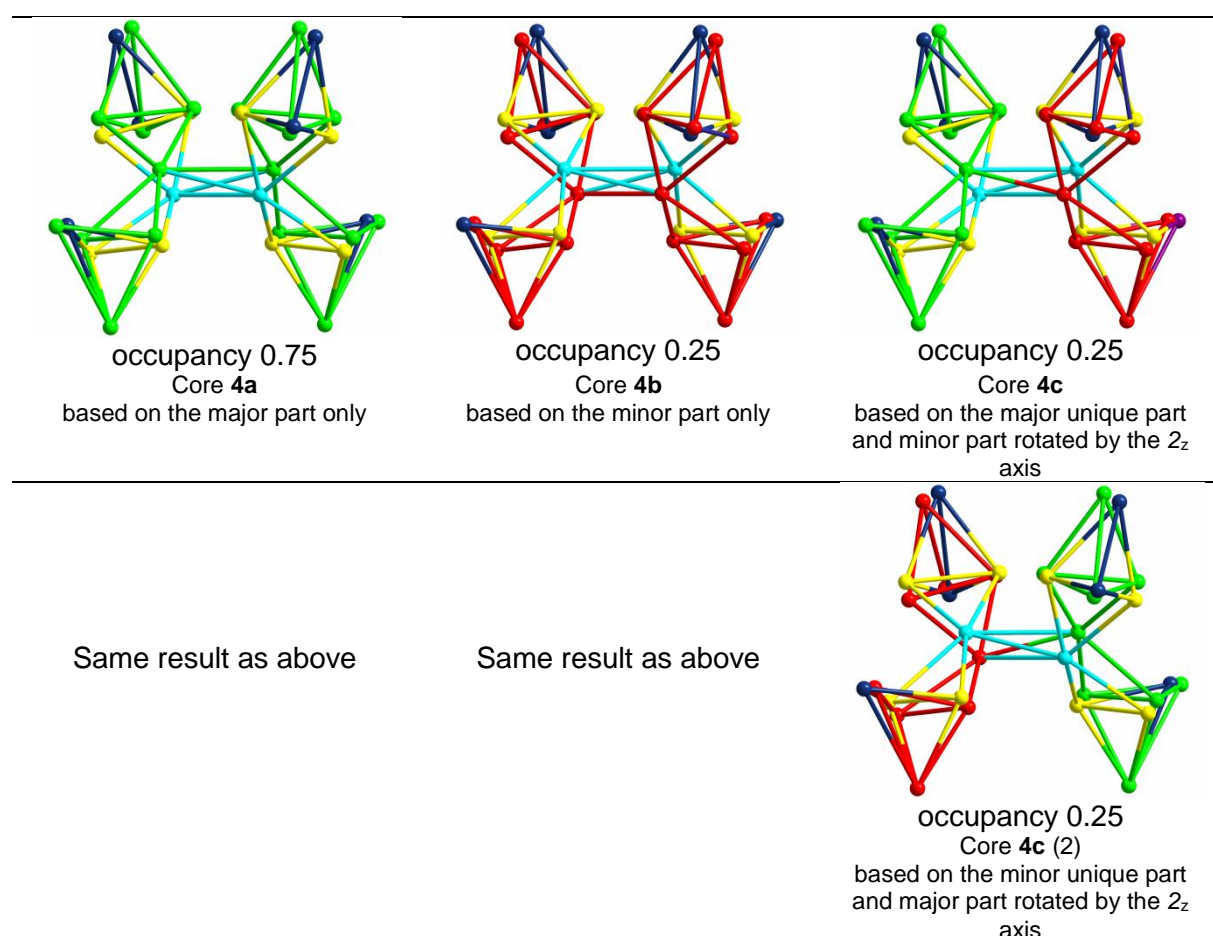

**Figure S3.** (a) Disordered cationic part in **4** and (b) the view of the disordered core with highlighted major (0.75, green bonds) and minor (0.25, red bonds). Occupancies are equal to the occupancy of the smallest contributing part.

There is no unambiguous interpretation of the structure model, as it is impossible to distinguish if it is either cores **4a** and **4b** co-exist (and have local rotational symmetry as they can be generated by 2-fold axis) or the core **4c** (which has no rotational symmetry) is disordered by the 2-folds axis and co-exists with the core **4a** (Figure S4). Obviously, co-existence of **4b** and **4c** is less probable if the occupancies are taken into account.

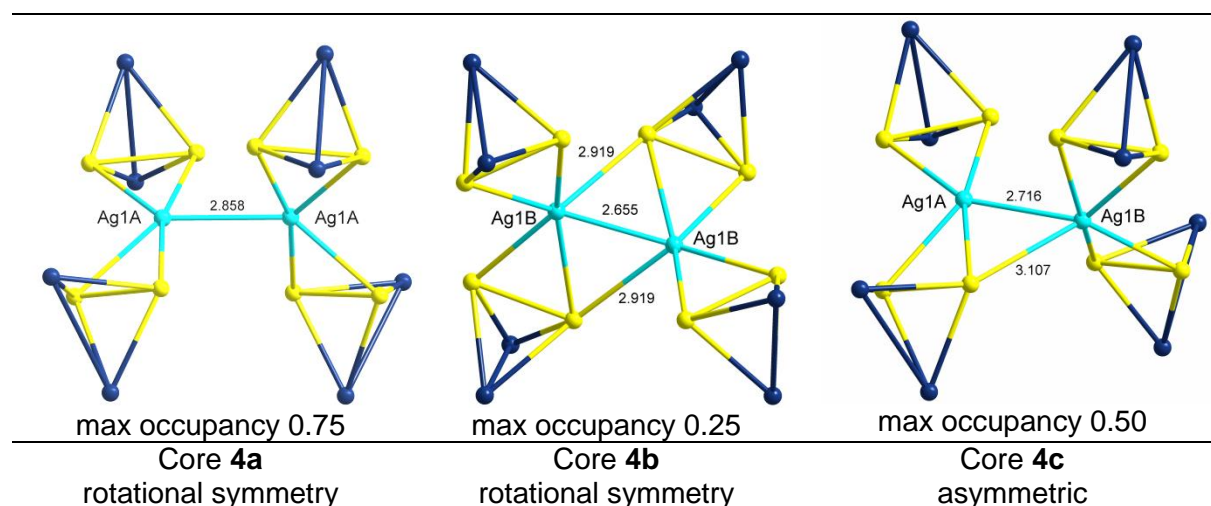

**Figure S4.** Possible inorganic cores of the complex **4**.

**Two (simplest) possible situations:** in the crystal structure co-exist different complexes:

Situation 1:  $0.75 \times (\text{Core I}) + 0.25 \times (\text{Core II})$

Situation 2:  $0.5 \times (\text{Core III}) + 0.5 \times (\text{Core I})$

or **any mixture** of all three complexes with a ratio that does not contradict crystallographic occupancies of the atoms. As one of possible examples, the solid solution of  $0.25 \times (\text{core 4a}) + 0.25 \times (\text{core 4b}) + 0.5 \times (\text{core 4c})$  is non-contradicting to the experimental data. More possible compositions can also be devised. Therefore, the answer to the question as to which of these alternatives do really exist, cannot be obtained from the X-ray structural data as the symmetry of the special position hides the initial forms.

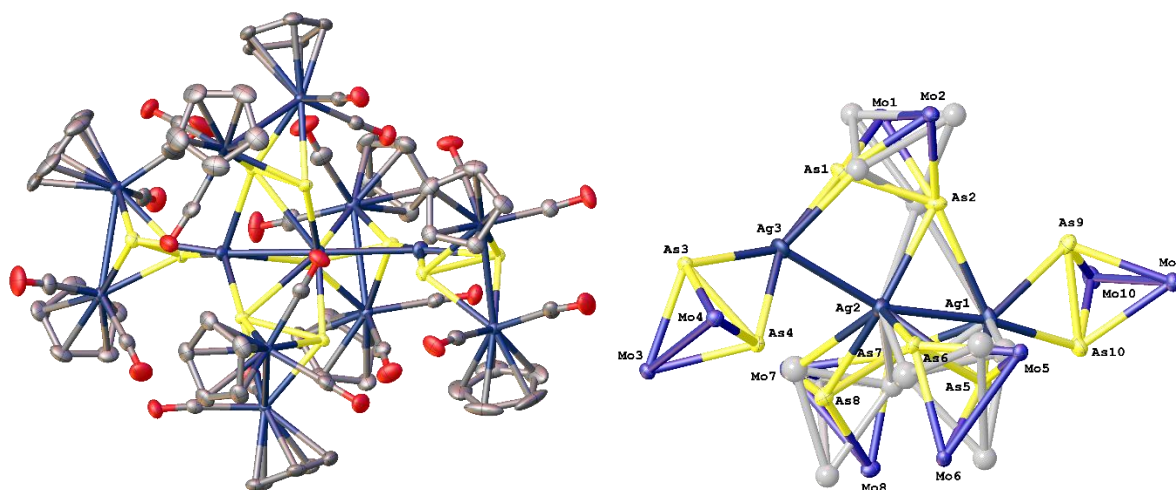

**Figure S5.** (left) Molecular structure of the cation of the compound **5** (H atoms are omitted); (right) the disorder of the  $\{\text{Mo}_2\text{As}_2\}$  units with a ratio of 0.97:0.03 (a.d.p. ellipsoids at 50% probability)

**Table 4S.** Selected geometric parameters ( $\text{\AA}$ ) for **5**

|          |            |           |            |
|----------|------------|-----------|------------|
| Ag1—As10 | 2.6709 (3) | Mo1A—As2A | 2.537 (15) |
| Ag1—As5A | 2.694 (11) | Mo1A—Mo2A | 3.036 (13) |
| Ag1—As9  | 2.7340 (3) | Mo2A—As1A | 2.542 (15) |
| Ag1—As5  | 2.7382 (3) | Mo2A—As2A | 2.664 (14) |
| Ag1—As7  | 2.7541 (3) | As1A—As2A | 2.400 (17) |
| Ag1—As7A | 2.826 (10) | Mo5A—As5A | 2.560 (15) |
| Ag1—Ag2  | 2.8376 (3) | Mo5A—As6A | 2.615 (15) |
| Ag1—As2  | 3.0218 (4) | Mo5A—Mo6A | 3.057 (13) |
| Ag1—As2A | 3.123 (11) | Mo6A—As5A | 2.600 (14) |
| Ag2—As6A | 2.438 (12) | Mo6A—As6A | 2.609 (15) |
| Ag2—As8  | 2.7204 (3) | As5A—As6A | 2.387 (16) |
| Ag2—As6  | 2.7513 (3) | Mo7A—As8A | 2.553 (14) |
| Ag2—As2  | 2.7566 (3) | Mo7A—As7A | 2.565 (13) |
| Ag2—As2A | 2.858 (11) | Mo7A—Mo8A | 2.989 (12) |
| Ag2—Ag3  | 2.9053 (3) | Mo8A—As7A | 2.524 (13) |
| Ag2—As7A | 2.942 (10) | Mo8A—As8A | 2.594 (14) |
| Ag2—As8A | 2.995 (11) | As7A—As8A | 2.321 (15) |
| Ag2—As7  | 3.0159 (3) | Mo1—As1   | 2.5144 (4) |
| Ag2—As5  | 3.0225 (3) | Mo1—As2   | 2.6539 (4) |
| Ag3—As1  | 2.4642 (3) | Mo1—Mo2   | 3.0689 (3) |
| Ag3—As4  | 2.5699 (3) | Mo2—As2   | 2.5635 (3) |
| Ag3—As1A | 2.604 (12) | Mo2—As1   | 2.6140 (4) |
| Ag3—As3  | 2.6519 (3) | Mo5—As6   | 2.5716 (3) |
| Mo3—As4  | 2.5824 (3) | Mo5—As5   | 2.6271 (3) |
| Mo3—As3  | 2.6023 (3) | Mo5—Mo6   | 3.0641 (3) |

|           |            |         |            |
|-----------|------------|---------|------------|
| Mo3—Mo4   | 3.1375 (3) | Mo6—As5 | 2.5636 (3) |
| Mo4—As3   | 2.5511 (3) | Mo6—As6 | 2.6665 (3) |
| Mo4—As4   | 2.5940 (3) | Mo7—As7 | 2.5587 (3) |
| Mo9—As9   | 2.5514 (3) | Mo7—As8 | 2.6519 (3) |
| Mo9—As10  | 2.6323 (3) | Mo7—Mo8 | 3.0465 (3) |
| Mo9—Mo10  | 3.0480 (3) | Mo8—As8 | 2.5792 (3) |
| Mo10—As10 | 2.5589 (3) | Mo8—As7 | 2.6359 (3) |
| Mo10—As9  | 2.6304 (3) | As1—As2 | 2.3748 (4) |
| As3—As4   | 2.4585 (3) | As5—As6 | 2.3693 (4) |
| As9—As10  | 2.3968 (4) | As7—As8 | 2.3738 (4) |
| Mo1A—As1A | 2.536 (16) |         |            |

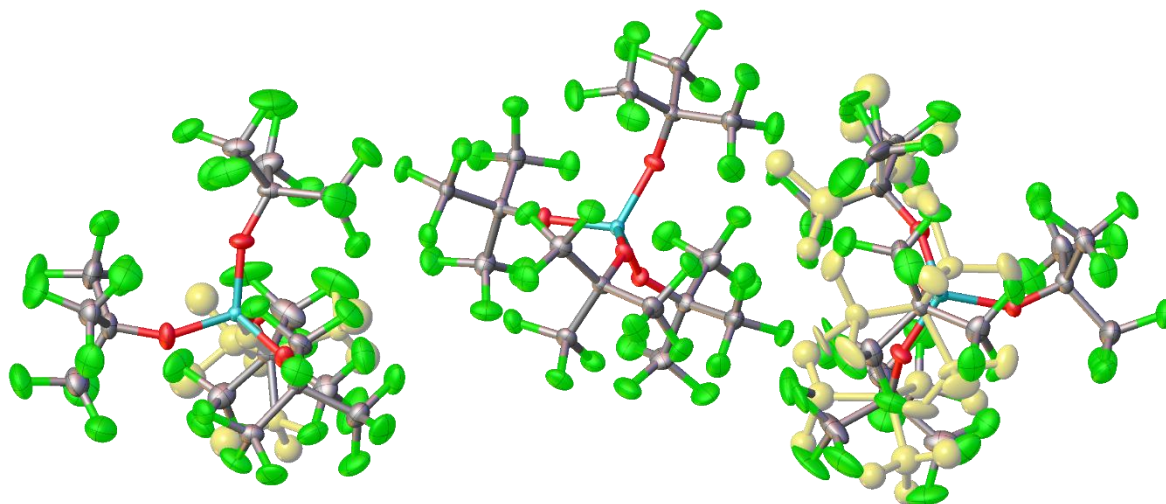

**Figure S6.** The TEF anions (disordered groups are shown in pale yellow) in the structure of the compound **5** (a.d.p. ellipsoids at 50% probability).

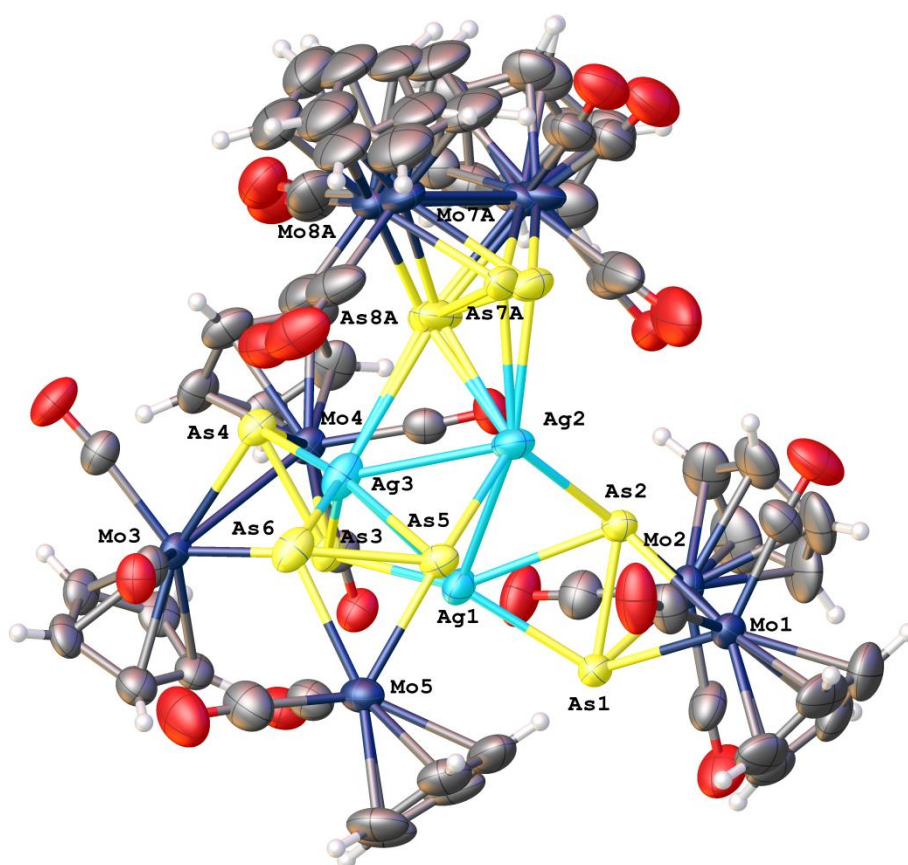

**Figure S7.** The structure of the cationic complex in the compound **6** (a.d.p. ellipsoids at 50% probability).

**Table S5.** Selected geometric parameters (Å) for **6**

|          |             |           |             |
|----------|-------------|-----------|-------------|
| Ag1—Ag3  | 2.8904 (8)  | Mo1—Mo2   | 3.0627 (9)  |
| Ag1—Ag2  | 2.9800 (8)  | Mo1—As2   | 2.6069 (9)  |
| Ag1—As3  | 2.5738 (8)  | Mo1—As1   | 2.5643 (10) |
| Ag1—As2  | 2.7923 (9)  | Mo2—As2   | 2.5357 (10) |
| Ag1—As1  | 2.6133 (9)  | Mo2—As1   | 2.6413 (10) |
| Mo3—Mo4  | 3.0759 (8)  | Mo5—As5   | 2.5566 (10) |
| Mo3—As3  | 2.5424 (9)  | Mo5—As6   | 2.6267 (11) |
| Mo3—As4  | 2.6345 (10) | As3—As4   | 2.4066 (10) |
| Ag3—Ag2  | 2.8625 (9)  | Mo7A—As8A | 2.540 (9)   |
| Ag3—As3  | 2.8582 (9)  | Mo7A—Mo8A | 3.064 (7)   |
| Ag3—As4  | 2.6054 (9)  | Mo7A—As7A | 2.649 (5)   |
| Ag3—As5  | 2.8190 (9)  | As2—As1   | 2.4095 (11) |
| Ag3—As8A | 2.989 (8)   | As5—As6   | 2.4066 (12) |
| Ag3—As6  | 2.6312 (11) | As8A—Mo8A | 2.596 (7)   |
| Ag2—As2  | 2.6718 (10) | As8A—As7A | 2.378 (5)   |
| Ag2—As5  | 2.7041 (10) | Mo8A—As7A | 2.529 (4)   |

|          |            |           |            |
|----------|------------|-----------|------------|
| Ag2—As8A | 2.737 (7)  | Mo8B—As7B | 2.579 (5)  |
| Ag2—As7A | 2.730 (5)  | Mo8B—Mo7B | 3.029 (8)  |
| Ag2—As7B | 2.680 (4)  | Mo8B—As8B | 2.627 (9)  |
| Ag2—As8B | 2.683 (9)  | As7B—Mo7B | 2.585 (5)  |
| Mo4—As3  | 2.6042 (9) | As7B—As8B | 2.365 (6)  |
| Mo4—As4  | 2.5564 (9) | Mo7B—As8B | 2.550 (11) |

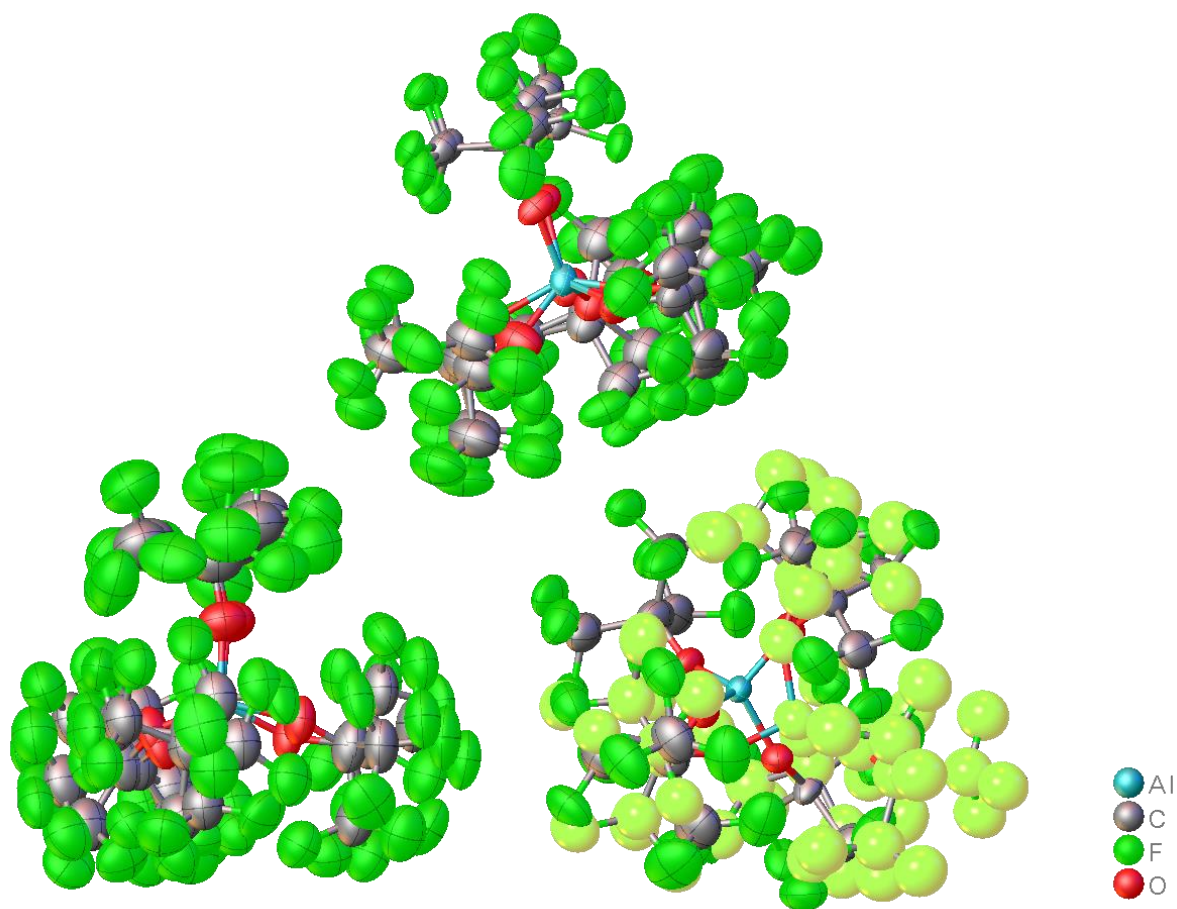

**Figure S8.** The TEF anions (disordered groups are shown in pale yellow) in the structure of the compound **6** (a.d.p. ellipsoids at 50% probability).

## DFT calculations

The DFT calculations have been performed with Gaussian 09<sup>[7]</sup> at the  $\omega$ B97XD<sup>[8]</sup>/def2-SVP<sup>[9]</sup> (for  $[(\text{Cp}(\text{CO})_2\text{Mo})_2(\text{As}_2)_4\text{Ag}_2]^{2+}$  and  $[(\text{Cp}(\text{CO})_2\text{Mo})_2(\text{As}_2)_2\text{Ag}]^{1+}$ ) and B3LYP<sup>[10]</sup>/Def2-TZVP<sup>[9]</sup> (for  $[(\text{CpMo}(\text{CO})_2)_2(\eta^2\text{-P}_2)]$  and  $[(\text{CpMo}(\text{CO})_2)_2(\eta^2\text{-As}_2)]$ ) level of theory. For the calculation of reaction energies, the SCF energies were used without corrections for zero point vibrations. Natural Bonding Orbitals (NBOs) for orbital energy diagram were generated using NBO7 program package.<sup>[11]</sup>

**Table 6S.** Cartesian coordinates of the gas-phase optimized geometry of  $[(\text{Cp}(\text{CO})_2\text{Mo})_2(\text{As}_2)_4\text{Ag}_2]^{2+}$  at the  $\omega$ B97XD/def2-SVP level of theory. E = -22083.8841414 Hartree.

| Atom | x            | y            | z            |
|------|--------------|--------------|--------------|
| Ag   | -0.000866000 | -1.594029000 | -0.026443000 |
| Ag   | 0.000866000  | 1.594029000  | -0.026443000 |
| As   | 1.515199000  | -3.335603000 | -1.450448000 |
| As   | 1.940414000  | -1.007319000 | -1.853091000 |
| As   | -1.485453000 | -3.253201000 | 1.573342000  |
| As   | -1.989238000 | -0.908669000 | 1.693120000  |
| Mo   | 4.011374000  | -2.496227000 | -1.554668000 |
| Mo   | 2.028208000  | -2.703223000 | -3.871395000 |
| Mo   | -3.977864000 | -2.658945000 | 1.536702000  |
| Mo   | -2.108387000 | -2.198671000 | 3.906483000  |
| As   | -1.515199000 | 3.335603000  | -1.450448000 |
| As   | -1.940414000 | 1.007319000  | -1.853091000 |
| As   | 1.485453000  | 3.253201000  | 1.573342000  |
| As   | 1.989238000  | 0.908669000  | 1.693120000  |
| Mo   | -4.011374000 | 2.496227000  | -1.554668000 |
| Mo   | -2.028208000 | 2.703223000  | -3.871395000 |
| Mo   | 3.977864000  | 2.658945000  | 1.536702000  |
| Mo   | 2.108387000  | 2.198671000  | 3.906483000  |
| C    | 2.137965000  | 1.836553000  | 6.160565000  |
| H    | 1.446672000  | 2.321408000  | 6.846963000  |
| C    | 3.436039000  | 2.309748000  | 5.803808000  |
| H    | 3.895788000  | 3.228895000  | 6.163348000  |
| C    | 4.049441000  | 1.343001000  | 4.964910000  |
| H    | 5.061819000  | 1.392809000  | 4.574991000  |
| C    | 3.133166000  | 0.269675000  | 4.782761000  |
| H    | 3.312079000  | -0.644116000 | 4.219765000  |
| C    | 1.958637000  | 0.570148000  | 5.523407000  |
| H    | 1.102040000  | -0.089282000 | 5.628433000  |
| C    | -4.035706000 | 4.483947000  | -1.476566000 |
| O    | -4.140102000 | 5.625976000  | -1.439355000 |
| C    | 2.039701000  | 4.173861000  | 4.147826000  |
| O    | 2.020450000  | 5.298045000  | 4.371097000  |
| O    | -3.506698000 | 2.412349000  | 1.534924000  |
| O    | 0.835362000  | 1.492291000  | -4.203163000 |
| O    | -3.329851000 | 0.104952000  | -5.050037000 |
| O    | -1.014673000 | 2.140633000  | 4.055659000  |
| O    | 3.671416000  | 1.982062000  | -1.499321000 |
| C    | 4.791278000  | 0.897744000  | 1.940526000  |
| O    | 5.365354000  | -0.068671000 | 2.183406000  |
| C    | -3.663634000 | 2.454078000  | 0.399227000  |
| C    | -5.672044000 | 0.961928000  | -1.128553000 |
| H    | -5.614794000 | 0.251313000  | -0.309565000 |
| C    | -6.233031000 | 2.276416000  | -1.062093000 |
| H    | -6.690288000 | 2.740207000  | -0.190582000 |
| C    | -6.161403000 | 2.836110000  | -2.371345000 |
| H    | -6.541719000 | 3.813383000  | -2.664713000 |
| C    | -5.564384000 | 1.882530000  | -3.235458000 |
| H    | -5.417659000 | 1.997185000  | -4.305624000 |
| C    | -5.254702000 | 0.725909000  | -2.464895000 |
| H    | -4.816164000 | -0.194462000 | -2.842525000 |
| C    | -0.223648000 | 1.906145000  | -4.050847000 |
| C    | -2.834605000 | 1.016441000  | -4.563595000 |
| C    | -3.368750000 | 4.510205000  | -4.607539000 |
| H    | -4.335878000 | 4.788716000  | -4.198830000 |
| C    | -3.146476000 | 3.614524000  | -5.685412000 |
| H    | -3.915933000 | 3.085321000  | -6.245211000 |

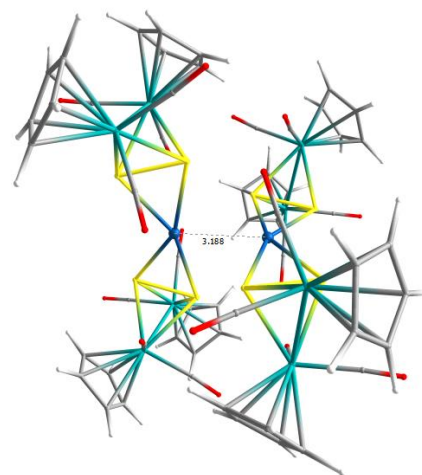



|   |              |              |              |
|---|--------------|--------------|--------------|
| C | -1.746838000 | 3.580772000  | -5.960551000 |
| H | -1.266107000 | 3.038048000  | -6.771746000 |
| C | -1.106409000 | 4.462432000  | -5.033525000 |
| H | -0.044126000 | 4.697235000  | -5.003289000 |
| C | -2.108387000 | 5.029717000  | -4.199787000 |
| H | -1.950632000 | 5.777757000  | -3.425804000 |
| C | 0.128432000  | 2.179253000  | 3.960998000  |
| C | 3.753381000  | 2.181520000  | -0.371441000 |
| C | 4.335219000  | 4.963335000  | 1.855081000  |
| H | 3.550494000  | 5.711708000  | 1.942721000  |
| C | 4.968597000  | 4.289587000  | 2.937328000  |
| H | 4.759019000  | 4.437565000  | 3.992551000  |
| C | 5.977552000  | 3.447856000  | 2.400934000  |
| H | 6.667555000  | 2.832619000  | 2.975993000  |
| C | 5.983246000  | 3.601909000  | 0.982584000  |
| H | 6.685846000  | 3.143380000  | 0.289874000  |
| C | 4.961357000  | 4.545535000  | 0.650231000  |
| H | 4.735621000  | 4.919792000  | -0.346645000 |
| C | -2.137965000 | -1.836553000 | 6.160565000  |
| H | -1.446672000 | -2.321408000 | 6.846963000  |
| C | -3.436039000 | -2.309748000 | 5.803808000  |
| H | -3.895788000 | -3.228895000 | 6.163348000  |
| C | -4.049441000 | -1.343001000 | 4.964910000  |
| H | -5.061819000 | -1.392809000 | 4.574991000  |
| C | -3.133166000 | -0.269675000 | 4.782761000  |
| H | -3.312079000 | 0.644116000  | 4.219765000  |
| C | -1.958637000 | -0.570148000 | 5.523407000  |
| H | -1.102040000 | 0.089282000  | 5.628433000  |
| C | 4.035706000  | -4.483947000 | -1.476566000 |
| O | 4.140102000  | -5.625976000 | -1.439355000 |
| C | -2.039701000 | -4.173861000 | 4.147826000  |
| O | -2.020450000 | -5.298045000 | 4.371097000  |
| O | 3.506698000  | -2.412349000 | 1.534924000  |
| O | -0.835362000 | -1.492291000 | -4.203163000 |
| O | 3.329851000  | -0.104952000 | -5.050037000 |
| O | 1.014673000  | -2.140633000 | 4.055659000  |
| O | -3.671416000 | -1.982062000 | -1.499321000 |
| C | -4.791278000 | -0.897744000 | 1.940526000  |
| O | -5.365354000 | 0.068671000  | 2.183406000  |
| C | 3.663634000  | -2.454078000 | 0.399227000  |
| C | 5.672044000  | -0.961928000 | -1.128553000 |
| H | 5.614794000  | -0.251313000 | -0.309565000 |
| C | 6.233031000  | -2.276416000 | -1.062093000 |
| H | 6.690288000  | -2.740207000 | -0.190582000 |
| C | 6.161403000  | -2.836110000 | -2.371345000 |
| H | 6.541719000  | -3.813383000 | -2.664713000 |
| C | 5.564384000  | -1.882530000 | -3.235458000 |
| H | 5.417659000  | -1.997185000 | -4.305624000 |
| C | 5.254702000  | -0.725909000 | -2.464895000 |
| H | 4.816164000  | 0.194462000  | -2.842525000 |
| C | 0.223648000  | -1.906145000 | -4.050847000 |
| C | 2.834605000  | -1.016441000 | -4.563595000 |
| C | 3.368750000  | -4.510205000 | -4.607539000 |
| H | 4.335878000  | -4.788716000 | -4.198830000 |
| C | 3.146476000  | -3.614524000 | -5.685412000 |
| H | 3.915933000  | -3.085321000 | -6.245211000 |
| C | 1.746838000  | -3.580772000 | -5.960551000 |
| H | 1.266107000  | -3.038048000 | -6.771746000 |
| C | 1.106409000  | -4.462432000 | -5.033525000 |
| H | 0.044126000  | -4.697235000 | -5.003289000 |
| C | 2.108387000  | -5.029717000 | -4.199787000 |
| H | 1.950632000  | -5.777757000 | -3.425804000 |
| C | -0.128432000 | -2.179253000 | 3.960998000  |
| C | -3.753381000 | -2.181520000 | -0.371441000 |
| C | -4.335219000 | -4.963335000 | 1.855081000  |
| H | -3.550494000 | -5.711708000 | 1.942721000  |
| C | -4.968597000 | -4.289587000 | 2.937328000  |
| H | -4.759019000 | -4.437565000 | 3.992551000  |
| C | -5.977552000 | -3.447856000 | 2.400934000  |
| H | -6.667555000 | -2.832619000 | 2.975993000  |
| C | -5.983246000 | -3.601909000 | 0.982584000  |
| H | -6.685846000 | -3.143380000 | 0.289874000  |
| C | -4.961357000 | -4.545535000 | 0.650231000  |
| H | -4.735621000 | -4.919792000 | -0.346645000 |

**Table 7S.** Cartesian coordinates of the gas-phase optimized geometry of  $[(\text{Cp}(\text{CO})_2\text{Mo})_2(\text{As}_2)]_2\text{Ag}]^+$  at the  $\omega\text{B97XD}/\text{def2-SVP}$  level of theory.  $E = -11041.940186$  Hartree.

| Atom | x            | y            | z            |
|------|--------------|--------------|--------------|
| Ag   | -0.001021000 | -0.000373000 | -0.000068000 |
| As   | -2.389062000 | 0.689827000  | 0.979702000  |
| As   | -2.389157000 | -0.690014000 | -0.979720000 |
| As   | 2.388013000  | -0.507348000 | 1.085472000  |
| As   | 2.388002000  | 0.507102000  | -1.085535000 |
| Mo   | -4.110070000 | -1.297193000 | 0.812890000  |
| Mo   | -4.109837000 | 1.297286000  | -0.812948000 |
| Mo   | 4.110057000  | 1.352855000  | 0.722413000  |
| Mo   | 4.110387000  | -1.352761000 | -0.722338000 |
| C    | 5.439321000  | -2.757969000 | -1.939482000 |
| H    | 5.424200000  | -3.826150000 | -1.800533000 |
| C    | 6.303621000  | -1.838899000 | -1.283998000 |
| H    | 7.049807000  | -2.093328000 | -0.548626000 |
| C    | 6.056987000  | -0.547839000 | -1.803828000 |
| H    | 6.582604000  | 0.352158000  | -1.537103000 |
| C    | 5.030178000  | -0.655264000 | -2.775011000 |
| H    | 4.637282000  | 0.152315000  | -3.369879000 |
| C    | 4.648856000  | -2.014941000 | -2.862652000 |
| H    | 3.915319000  | -2.420661000 | -3.540100000 |
| C    | -4.597070000 | -0.220722000 | 2.413801000  |
| O    | -4.948873000 | 0.339837000  | 3.344968000  |
| C    | 4.602556000  | -2.200638000 | 1.009759000  |
| O    | 4.957763000  | -2.726334000 | 1.959653000  |
| O    | -1.825962000 | -2.664274000 | 2.455528000  |
| O    | -1.825444000 | 2.664102000  | -2.455410000 |
| O    | -4.949052000 | -0.339771000 | -3.344871000 |
| O    | 1.829594000  | -3.463927000 | -1.071768000 |
| O    | 1.828835000  | 3.463587000  | 1.071682000  |
| C    | 4.602211000  | 2.200817000  | -1.009642000 |
| O    | 4.957454000  | 2.726608000  | -1.959471000 |
| C    | -2.636072000 | -2.127611000 | 1.861583000  |
| C    | -4.647424000 | -3.479372000 | 0.304268000  |
| H    | -3.909407000 | -4.264748000 | 0.305450000  |
| C    | -5.429545000 | -3.062832000 | 1.419839000  |
| H    | -5.404108000 | -3.486511000 | 2.409983000  |
| C    | -6.303793000 | -2.037931000 | 0.967480000  |
| H    | -7.045893000 | -1.535027000 | 1.566606000  |
| C    | -6.069732000 | -1.829034000 | -0.410380000 |
| H    | -6.605868000 | -1.146293000 | -1.045986000 |
| C    | -5.042368000 | -2.715990000 | -0.819696000 |
| H    | -4.657119000 | -2.817376000 | -1.820632000 |
| C    | -2.635695000 | 2.127467000  | -1.861632000 |
| C    | -4.596974000 | 0.220906000  | -2.413879000 |
| C    | -6.069430000 | 1.829426000  | 0.410297000  |
| H    | -6.605688000 | 1.146764000  | 1.045887000  |
| C    | -6.303438000 | 2.038376000  | -0.967564000 |
| H    | -7.045611000 | 1.535597000  | -1.566705000 |
| C    | -5.429025000 | 3.063146000  | -1.419899000 |
| H    | -5.403507000 | 3.486834000  | -2.410038000 |
| C    | -4.646852000 | 3.479548000  | -0.304312000 |
| H    | -3.908715000 | 4.264810000  | -0.305475000 |
| C    | -5.041935000 | 2.716218000  | 0.819638000  |
| H    | -4.656689000 | 2.817537000  | 1.820582000  |
| C    | 2.638969000  | -2.678678000 | -0.909237000 |
| C    | 2.638360000  | 2.678489000  | 0.909169000  |
| C    | 5.029821000  | 0.655638000  | 2.775198000  |
| H    | 4.637012000  | -0.151966000 | 3.370089000  |
| C    | 6.056711000  | 0.548311000  | 1.804090000  |
| H    | 6.582485000  | -0.351622000 | 1.537453000  |
| C    | 6.303174000  | 1.839375000  | 1.284189000  |
| H    | 7.049373000  | 2.093874000  | 0.548853000  |
| C    | 5.438679000  | 2.758352000  | 1.939550000  |
| H    | 5.423392000  | 3.826521000  | 1.800530000  |
| C    | 4.648271000  | 2.015260000  | 2.862716000  |
| H    | 3.914628000  | 2.420909000  | 3.540092000  |

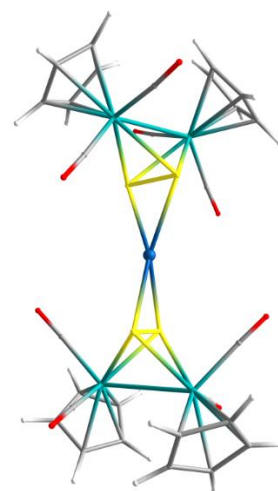

**Table 8S.** Cartesian coordinates of the gas-phase optimized geometry of  $[\{\text{CpMo}(\text{CO})_2\}_2(\eta^2\text{-P}_2)]$  (A) at the B3LYP/def2-TZVP level of theory ( $E^0 = -1660.18758083$  a.u.)

| Atom | x            | y            | z            |
|------|--------------|--------------|--------------|
| Mo   | 1.546765000  | 0.078822000  | 0.030094000  |
| Mo   | -1.546984000 | -0.079047000 | 0.029774000  |
| P    | 0.141107000  | -1.034867000 | 1.757351000  |
| P    | -0.141067000 | 1.025672000  | 1.762769000  |
| C    | 3.270524000  | -1.471824000 | -0.413286000 |
| H    | 3.923563000  | -1.816618000 | 0.371676000  |
| C    | 3.476965000  | -0.317249000 | -1.227864000 |
| H    | 4.318947000  | 0.353094000  | -1.181150000 |
| C    | 2.403884000  | -0.252659000 | -2.157512000 |
| H    | 2.281970000  | 0.491842000  | -2.927459000 |
| C    | 1.547592000  | -1.356364000 | -1.923876000 |
| H    | 0.663008000  | -1.600453000 | -2.485764000 |
| C    | 2.081116000  | -2.107449000 | -0.841520000 |
| H    | 1.662621000  | -3.012830000 | -0.435765000 |
| C    | -3.476562000 | 0.323734000  | -1.227006000 |
| H    | -4.318538000 | -0.346894000 | -1.184436000 |
| C    | -2.403096000 | 0.264406000  | -2.156571000 |
| H    | -2.280742000 | -0.475797000 | -2.930590000 |
| C    | -1.547082000 | 1.366934000  | -1.916608000 |
| H    | -0.662499000 | 1.614394000  | -2.477059000 |
| C    | -2.081092000 | 2.111969000  | -0.830304000 |
| H    | -1.662989000 | 3.015236000  | -0.419462000 |
| C    | -3.270595000 | 1.473853000  | -0.406045000 |
| H    | -3.924080000 | 1.814311000  | 0.380439000  |
| O    | 3.476992000  | 1.037483000  | 2.304253000  |
| O    | 1.214850000  | 3.083379000  | -0.791439000 |
| O    | -3.477105000 | -1.049829000 | 2.298875000  |
| O    | -1.214795000 | -3.079328000 | -0.807527000 |
| C    | 2.727094000  | 0.703982000  | 1.502688000  |
| C    | 1.291522000  | 1.985222000  | -0.450432000 |
| C    | -2.727285000 | -0.711976000 | 1.499060000  |
| C    | -1.291689000 | -1.983010000 | -0.460719000 |

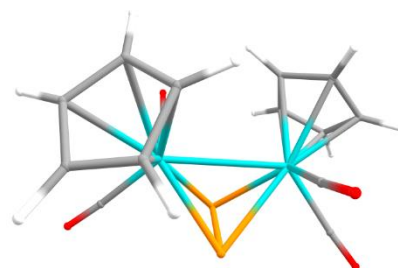

**Table 9S.** Cartesian coordinates of the gas-phase optimized geometry of  $[\{\text{CpMo}(\text{CO})_2\}_2(\eta^2\text{-As}_2)]$  (B) at the B3LYP/def2-TZVP level of theory ( $E^0 = -5449.28758843$  a.u.)

| Atom | x            | y            | z            |
|------|--------------|--------------|--------------|
| Mo   | -1.564482000 | 0.209398000  | -0.086630000 |
| Mo   | 1.564497000  | 0.209407000  | 0.086665000  |
| As   | -0.158528000 | -1.605754000 | 1.149006000  |
| As   | 0.158561000  | -1.605541000 | -1.149298000 |
| C    | -3.282143000 | 0.718768000  | 1.440902000  |
| H    | -3.961108000 | -0.042357000 | 1.788999000  |
| C    | -3.454711000 | 1.524474000  | 0.275696000  |
| H    | -4.291604000 | 1.494258000  | -0.401781000 |
| C    | -2.352546000 | 2.420476000  | 0.209198000  |
| H    | -2.203133000 | 3.178497000  | -0.542430000 |
| C    | -1.514551000 | 2.177621000  | 1.325216000  |
| H    | -0.618209000 | 2.717938000  | 1.574157000  |
| C    | -2.086105000 | 1.120960000  | 2.083859000  |
| H    | -1.691353000 | 0.718920000  | 3.001412000  |
| C    | 3.454705000  | 1.524581000  | -0.275410000 |
| H    | 4.291594000  | 1.494260000  | 0.402068000  |
| C    | 2.352523000  | 2.420551000  | -0.208761000 |
| H    | 2.203089000  | 3.178436000  | 0.543000000  |
| C    | 1.514548000  | 2.177884000  | -1.324834000 |
| H    | 0.618201000  | 2.718232000  | -1.573688000 |
| C    | 2.086125000  | 1.121364000  | -2.083657000 |
| H    | 1.691390000  | 0.719479000  | -3.001285000 |

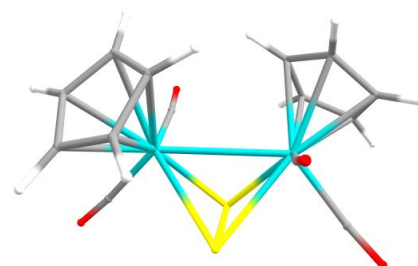

|   |              |              |              |
|---|--------------|--------------|--------------|
| C | 3.282163000  | 0.719079000  | -1.440760000 |
| H | 3.961144000  | -0.041973000 | -1.788986000 |
| O | -3.545622000 | -2.045765000 | -0.976932000 |
| O | -1.254277000 | 1.027658000  | -3.093687000 |
| O | 3.545483000  | -2.046084000 | 0.976526000  |
| O | 1.254177000  | 1.026919000  | 3.093924000  |
| C | -2.768474000 | -1.257533000 | -0.671223000 |
| C | -1.318043000 | 0.673636000  | -1.997560000 |
| C | 2.768511000  | -1.257606000 | 0.671007000  |
| C | 1.318029000  | 0.673309000  | 1.997669000  |

**Table 10S.** Energy diagram of selected Natural Bond Orbitals (NBOs) for compounds  $[\text{Cp}_2\text{Mo}_2(\text{CO})_4(\eta^2\text{-E}_2)]$  ( $\text{E} = \text{P}$  (**A**), As (**As**)), calculated at the B3LYP/def2-TZVP level of theory. BD stands for sigma bonds; LP stands for lone pairs.

| $[\text{Cp}_2\text{Mo}_2(\text{CO})_4(\eta^2\text{-P}_2)]$ ( <b>A</b> ) |            | $[\text{Cp}_2\text{Mo}_2(\text{CO})_4(\eta^2\text{-P}_2)]$ ( <b>B</b> ) |            |
|-------------------------------------------------------------------------|------------|-------------------------------------------------------------------------|------------|
| Orbital                                                                 | Energy, eV | Orbital                                                                 | Energy, eV |
| LP (1) P 3                                                              | -10.747    | LP (1)As 3                                                              | -11.614    |
| LP (1) P 4                                                              | -10.747    | LP (1)As 4                                                              | -11.614    |
| BD (1) P 3- P 4                                                         | -10.191    | BD (1)As 3-As 4                                                         | -8.766     |
| BD (1)Mo 1- P 3                                                         | -6.680     | BD (1)Mo 1-As 3                                                         | -7.068     |
| BD (1)Mo 1- P 4                                                         | -4.689     | BD (1)Mo 1-As 4                                                         | -5.947     |
| BD (1)Mo 2- P 3                                                         | -4.689     | BD (1)Mo 2-As 3                                                         | -5.946     |
| BD (1)Mo 2- P 4                                                         | -6.679     | BD (1)Mo 2-As 4                                                         | -7.068     |
| BD (1)Mo 1-Mo 2                                                         | -4.109     | LP (2)Mo 2 <sup>†</sup>                                                 | 7.585      |
| BD*(1)Mo 1-Mo 2                                                         | 1.757      | LV (2)Mo 2 <sup>†</sup>                                                 | 7.585      |
| BD*(1)Mo 1- P 3                                                         | 4.426      | BD*(1)Mo 1-As 3                                                         | 1.846      |
| BD*(1)Mo 1- P 4                                                         | 5.205      | BD*(1)Mo 1-As 4                                                         | 1.652      |
| BD*(1)Mo 2- P 3                                                         | 5.203      | BD*(1)Mo 2-As 3                                                         | 1.652      |
| BD*(1)Mo 2- P 4                                                         | 4.423      | BD*(1)Mo 2-As 4                                                         | 1.846      |
| BD*(1) P 3- P 4                                                         | 3.500      | BD*(1)As 3-As 4                                                         | 1.411      |

<sup>†</sup> for  $[\text{Cp}_2\text{Mo}_2(\text{CO})_4(\eta^2\text{-P}_2)]$  (**B**) we were unable to localize the Mo-Mo bond. Corresponding orbital, though having density on both Molybdenum atoms, was designated as molybdenum lone pair (LP and LV respectively).

## References:

- O. J. Scherer, C. Blath, G. Wolmershäuser, *J. Organomet. Chem.* **1990**, *387*, C21-C24
- T. Köchner, N. Trapp, T. A. Engesser, A. J. Lehner, C. Röhr, S. Riedel, C. Knapp, H. Scherer, I. Krossing, *Angew. Chem. Int. Ed.* **2011**, *50*, 11253-11256; *Angew. Chem.* **2011**, *123*, 11449-11452.
- I. Krossing, *Chem. Eur. J.* **2001**, *7*, 490-502.
- CrysAlisPRO*, different versions 2006-2020, Rigaku Oxford Diffraction.
- G. M. Sheldrick. *Acta Cryst.* **2015**, *C71*, 3-8.
- O.V. Dolomanov, L.J. Bourhis, R.J. Gildea, J.A.K. Howard, H. Puschmann, *J. Appl. Cryst.* **2009**, *42*, 339-341.
- Gaussian 09, Revision E.01, M. J. Frisch, G. W. Trucks, H. B. Schlegel, G. E. Scuseria, M. A. Robb, J. R. Cheeseman, G. Scalmani, V. Barone, B. Mennucci, G. A. Petersson, H. Nakatsuji, M. Caricato, X. Li, H. P. Hratchian, A. F. Izmaylov, J. Bloino, G. Zheng, J. L. Sonnenberg, M. Hada, M. Ehara, K. Toyota, R. Fukuda, J. Hasegawa, M. Ishida, T. Nakajima, Y. Honda, O. Kitao, H. Nakai, T. Vreven, J. A. Montgomery, Jr., J. E. Peralta, F. Ogliaro, M. Bearpark, J. J. Heyd, E. Brothers, K. N. Kudin, V. N. Staroverov, T. Keith, R. Kobayashi, J. Normand, K. Raghavachari, A. Rendell, J. C. Burant, S. S. Iyengar, J. Tomasi, M. Cossi, N. Rega, J. M.

Millam, M. Klene, J. E. Knox, J. B. Cross, V. Bakken, C. Adamo, J. Jaramillo, R. Gomperts, R. E. Stratmann, O. Yazyev, A. J. Austin, R. Cammi, C. Pomelli, J. W. Ochterski, R. L. Martin, K. Morokuma, V. G. Zakrzewski, G. A. Voth, P. Salvador, J. J. Dannenberg, S. Dapprich, A. D. Daniels, O. Farkas, J. B. Foresman, J. V. Ortiz, J. Cioslowski, and D. J. Fox, Gaussian, Inc., Wallingford CT, **2013**.

8. J.-D. Chai, M. Head-Gordon, *Phys. Chem. Chem. Phys.* **2008**, *10*, 6615-6620.
9. a) F. Weigend, M. Häser, H. Patzelt, R. Ahlrichs, *Chem. Phys. Letters* **1998**, *294*, 143-152; b) F. Weigend, R. Ahlrichs, *Phys. Chem. Chem. Phys.* **2005**, *7*, 3297-3305; c) F. Weigend, *Phys. Chem. Chem. Phys.* **2006**, *8*, 1057-1065.
10. a) A. D. Becke, *J. Chem. Phys.* **1993**, *98*, 5648-5652; b) C. Lee, W. Yang, R. G. Parr, *Phys. Rev. B* **1988**, *37*, 785-789; c) S. H. Vosko, L. Wilk, M. Nusair, *Can. J. Phys.* **1980**, *58*, 1200-1211; d) P. J. Stephens, F. J. Devlin, C. F. Chabalowski, M. J. Frisch, *J. Phys. Chem.* **1994**, *98*, 11623-11627.
11. NBO 7.0. E. D. Glendening, J. K. Badenhoop, A. E. Reed, J. E. Carpenter, J. A. Bohmann, C. M. Morales, P. Karafiloglou, C. R. Landis, and F. Weinhold, (Theoretical Chemistry Institute, University of Wisconsin, Madison, WI, **2018**). <https://nbo6.chem.wisc.edu/>.
